# Supplementary material
Source: PubMed Central journal article supplement (PMC3871170)
Supplement: NIHMS502277-supplement-Supporting_Information.pdf [file NIHMS502277-supplement-Supporting_Information.pdf]

**Table S1.** Relative anisotropy fits for each PS

| Solution   | Rotational Lifetime (ns) |
|------------|--------------------------|
| Buffer     | $0.64 \pm 0.05$          |
| GGO        | $0.58 \pm 0.04$          |
| GGO Trolox | $0.72 \pm 0.04$          |
| GGO TSQ    | $0.62 \pm 0.03$          |
| GGO ROXS   | $0.67 \pm 0.04$          |
| PCA        | $0.47 \pm 0.03$          |
| PCA Trolox | $0.57 \pm 0.04$          |
| PCA TSQ    | $0.14 \pm 0.02$          |
| PCA ROXS   | $0.027 \pm 0.001$        |
